# Supplementary material
Source: PubMed Central journal article supplement (PMC4575681)

## OBSTRUCTIVE SLEEP APNEA (OSA) RISK ASSESSMENT

Please check (✓) the appropriate box (☐), fill in the blank(s).  
Then, total points (number in parenthesis) for each section.

ADDRESSOGRAPH

**Initial:** Do you have a prior diagnosis (by overnight sleep study) of obstructive sleep apnea?  
 Yes, and I DO routinely use CPAP or similar device (Skip questionnaire)  
 Yes, and I DO NOT routinely use CPAP or similar device (Skip questionnaire)  
 No (Continue below)

**SECTION 1: NIGHTTIME SYMPTOMS**

1. Do you snore?  
 Yes (1)  
 No (0) (Skip to question 5.)  
 Don't know/refused (0)
2. If you snore, your snoring is:  
 Slightly louder than breathing (0)  
 As loud as talking (0)  
 Louder than talking (0)  
 Very loud; can be heard in adjacent rooms (1)  
 Don't know/refused (0)
3. How often do you snore?  
 Nearly every day (1)  
 3 to 4 nights a week (1)  
 1 to 2 nights a week (0)  
 1 to 2 nights a month (0)  
 Never or nearly never/don't know (0)
4. Has your snoring ever bothered other people?  
 Yes (1)  
 No/don't know/refused (0)
5. Has anyone noticed that you quit breathing during your sleep?  
 Nearly every day (2)  
 3 to 4 times a week (2)  
 1 to 2 times a week (0)  
 1 to 2 times a month (0)  
 Never or nearly never/don't know/refused (0)

**SECTION 2: DAYTIME SYMPTOMS**

6. How often do you feel tired or fatigued after your sleep?  
 Nearly every day (1)  
 3 to 4 times a week (1)  
 1 to 2 times a week (0)  
 1 to 2 times a month (0)  
 Never or nearly never/don't know/refused (0)
7. During your wake time, do you feel tired, fatigued, or not up to par?  
 Nearly every day (1)  
 3 to 4 times a week (1)  
 1 to 2 times a week (0)  
 1 to 2 times a month (0)  
 Never or nearly never/don't know/refused (0)
8. Have you ever nodded off or fallen asleep while driving a vehicle?  
 Yes (1)  
 No/don't know/refused (0)
9. If yes, how often does it occur?  
 Nearly every day (1)  
 3 to 4 times a week (1)  
 1 to 2 times a week (0)  
 1 to 2 times a month (0)  
 Never or nearly never/don't know/refused (0)

**TOTAL POINTS FOR SECTION 1:** \_\_\_\_\_  
If greater than or equal to 2 this section is **Positive**

**TOTAL POINTS FOR SECTION 2:** \_\_\_\_\_  
If greater than or equal to 2 this section is **Positive**

**SECTION 3: COMORBIDITIES**

10. Do you have high blood pressure?  
 Yes (1)  
 No/don't know/refused (0)
11. BMI: \_\_\_\_\_ kg/m<sup>2</sup>  
 greater than 30kg/m<sup>2</sup> (1)  
 less than or equal to 30kg/m<sup>2</sup> (0)

**ADDITIONAL INFORMATION:**

Do you choke or gasp most nights?  Yes  No  
 Handedness:  Left  Right Neck Circumference: \_\_\_\_\_ cm

**SCORING:** IF THREE SECTIONS ARE POSITIVE OR IF TWO SECTIONS ARE POSITIVE PLUS THE PATIENT'S NECK CIRCUMFERENCE IS GREATER THAN 40 CM, THEN THE PATIENT IS AT HIGH-RISK FOR OBSTRUCTIVE SLEEP APNEA  
 **NOT HIGH-RISK FOR OSA**  
 **HIGH-RISK FOR OSA**

**TOTAL POINTS FOR SECTION 3:** \_\_\_\_\_  
If greater than or equal to 1 this section is **Positive**

Clinician: \_\_\_\_\_ Date/Time: \_\_\_\_\_  
SIGNATURE REQUIRED PRINTED NAME REQUIRED

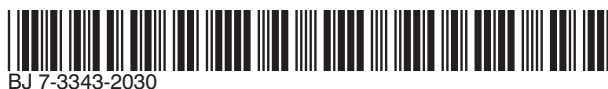

## OBSTRUCTIVE SLEEP APNEA (OSA) RISK ASSESSMENT

Please check (✓) the appropriate box (☐), fill in the blank(s).  
Then, total points (number in parenthesis) for each section.

ADDRESSOGRAPH

**Initial:** Do you have a prior diagnosis (by overnight sleep study) of obstructive sleep apnea?  
 Yes, and I DO routinely use CPAP or similar device (Skip questionnaire)  
 Yes, and I DO NOT routinely use CPAP or similar device (Skip questionnaire)  
 No (Continue below)

**SECTION 1: NIGHTTIME SYMPTOMS**

1. Do you snore?  
 Yes (1)  
 No (0) (Skip to question 5.)  
 Don't know/refused (0)
2. If you snore, your snoring is:  
 Slightly louder than breathing (0)  
 As loud as talking (0)  
 Louder than talking (0)  
 Very loud; can be heard in adjacent rooms (1)  
 Don't know/refused (0)
3. How often do you snore?  
 Nearly every day (1)  
 3 to 4 nights a week (1)  
 1 to 2 nights a week (0)  
 1 to 2 nights a month (0)  
 Never or nearly never/don't know (0)
4. Has your snoring ever bothered other people?  
 Yes (1)  
 No/don't know/refused (0)
5. Has anyone noticed that you quit breathing during your sleep?  
 Nearly every day (2)  
 3 to 4 times a week (2)  
 1 to 2 times a week (0)  
 1 to 2 times a month (0)  
 Never or nearly never/don't know/refused (0)

**SECTION 2: DAYTIME SYMPTOMS**

6. How often do you feel tired or fatigued after your sleep?  
 Nearly every day (1)  
 3 to 4 times a week (1)  
 1 to 2 times a week (0)  
 1 to 2 times a month (0)  
 Never or nearly never/don't know/refused (0)
7. During your wake time, do you feel tired, fatigued, or not up to par?  
 Nearly every day (1)  
 3 to 4 times a week (1)  
 1 to 2 times a week (0)  
 1 to 2 times a month (0)  
 Never or nearly never/don't know/refused (0)
8. Have you ever nodded off or fallen asleep while driving a vehicle?  
 Yes (1)  
 No/don't know/refused (0)
9. If yes, how often does it occur?  
 Nearly every day (1)  
 3 to 4 times a week (1)  
 1 to 2 times a week (0)  
 1 to 2 times a month (0)  
 Never or nearly never/don't know/refused (0)

**TOTAL POINTS FOR SECTION 1:** \_\_\_\_\_  
If greater than or equal to 2 this section is **Positive**

**TOTAL POINTS FOR SECTION 2:** \_\_\_\_\_  
If greater than or equal to 2 this section is **Positive**

**SECTION 3: COMORBIDITIES**

10. Do you have high blood pressure?  
 Yes (1)  
 No/don't know/refused (0)
11. BMI: \_\_\_\_\_ kg/m<sup>2</sup>  
 greater than 30kg/m<sup>2</sup> (1)  
 less than or equal to 30kg/m<sup>2</sup> (0)

**ADDITIONAL INFORMATION:**

Do you choke or gasp most nights?  Yes  No  
 Handedness:  Left  Right Neck Circumference: \_\_\_\_\_ cm

**SCORING:** IF THREE SECTIONS ARE POSITIVE OR IF TWO SECTIONS ARE POSITIVE PLUS THE PATIENT'S NECK CIRCUMFERENCE IS GREATER THAN 40 CM, THEN THE PATIENT IS AT HIGH-RISK FOR OBSTRUCTIVE SLEEP APNEA  
 **NOT HIGH-RISK FOR OSA**  
 **HIGH-RISK FOR OSA**

**TOTAL POINTS FOR SECTION 3:** \_\_\_\_\_  
If greater than or equal to 1 this section is **Positive**

Clinician: \_\_\_\_\_ Date/Time: \_\_\_\_\_  
SIGNATURE REQUIRED PRINTED NAME REQUIRED



Supplement: NIHMS552168-supplement-01.pdf [file NIHMS552168-supplement-01.pdf]
