# Supplementary material
Source: PubMed Central journal article supplement (PMC4575681)

**OBSTRUCTIVE SLEEP APNEA (OSA)  
PERIOPERATIVE ORDERS**

**(This is a supplement to the usual  
unit/surgery-specific postoperative orders)**

ADDRESSOGRAPH

Please check (✓) only the appropriate boxes (☐), fill in the blank(s) as needed, sign where required.

| DATE | TIME | ORDERS                                                                                                                                                                                                                                                                                                                                                                                                                                                                                                                                                                                                                                                                                                                                                                                                                                                                                                                                                                                                                                                                                                                                                                                                                                                                                                                                                                                                                                                                                                                                                                                                                                                                                                                                                                  |
|------|------|-------------------------------------------------------------------------------------------------------------------------------------------------------------------------------------------------------------------------------------------------------------------------------------------------------------------------------------------------------------------------------------------------------------------------------------------------------------------------------------------------------------------------------------------------------------------------------------------------------------------------------------------------------------------------------------------------------------------------------------------------------------------------------------------------------------------------------------------------------------------------------------------------------------------------------------------------------------------------------------------------------------------------------------------------------------------------------------------------------------------------------------------------------------------------------------------------------------------------------------------------------------------------------------------------------------------------------------------------------------------------------------------------------------------------------------------------------------------------------------------------------------------------------------------------------------------------------------------------------------------------------------------------------------------------------------------------------------------------------------------------------------------------|
|      |      | <p><b>Center for Preoperative Assessment and Planning</b></p> <p><input type="checkbox"/> Consult sleep medicine for new or presumed diagnosis of OSA (<b>Pager: 253-1902</b>).</p> <p><input type="checkbox"/> Notify in-patient sleep medicine patient with OSA of pending surgery (<b>Pager: 253-1902</b>).</p> <p><input type="checkbox"/> Obtain <input type="checkbox"/> arterial <input type="checkbox"/> venous blood gas as part of preoperative labs.</p> <p><input type="checkbox"/> Document oxygen saturation off oxygen (baseline oxygen saturation) in patient's chart.</p> <p><input type="checkbox"/> Obtain polysomnography report from the sleep laboratory where patient was tested.</p> <p><input type="checkbox"/> Obtain CPAP or BIPAP settings from the sleep laboratory where patient was tested.</p> <p>MD/LIP: _____<br/> <small>SIGNATURE REQUIRED</small> <small>PRINTED NAME REQUIRED</small></p> <p><input type="checkbox"/> Above orders completed by _____ on _____ (date)</p>                                                                                                                                                                                                                                                                                                                                                                                                                                                                                                                                                                                                                                                                                                                                                         |
|      |      | <p><b>Post-Anesthesia Care Unit</b></p> <p><input type="checkbox"/> Notify respiratory therapy (<b>Pager: 848-8116</b>) that patient with OSA is in PACU.</p> <p><input type="checkbox"/> Supplemental oxygen as per anesthesiologist's orders.</p> <p><input type="checkbox"/> If not contra-indicated, position patient on side or reverse-Trendelenberg.</p> <p><input type="checkbox"/> Record saturations while unstimulated or asleep (on O<sub>2</sub>). If saturation below 90%, alert MD, obtain ABG (or venous gas).</p> <p><input type="checkbox"/> Record respiratory rate while unstimulated or asleep. Call MD if less than 10/minute.</p> <p><input type="checkbox"/> Observe breathing pattern while unstimulated or asleep. Call MD if signs of obstruction.</p> <p><input type="checkbox"/> Obtain 3 O<sub>2</sub> saturation readings 15 minutes apart <i>off</i> O<sub>2</sub></p> <p>    a. Discontinue supplementary O<sub>2</sub> for 3 minutes</p> <p>    b. If saturation decreases below 90% <b>restart O<sub>2</sub></b>, alert MD, obtain ABG (or venous gas).</p> <p><input type="checkbox"/> Start patients home CPAP or BiPAP machine on home settings and home fittings.</p> <p><input type="checkbox"/> _____ cmH<sub>2</sub>O CPAP <i>or</i> <input type="checkbox"/> _____ cmH<sub>2</sub>O IPAP _____ cmH<sub>2</sub>O EPAP <b>with</b> <input type="checkbox"/> _____ L/Minute O<sub>2</sub></p> <p><input type="checkbox"/> Apply "OSA Risk" purple bracelet prior to discharge from PACU.</p> <p><input type="checkbox"/> Check ABG (or venous gas) at least 15 minutes prior to planned discharge.</p> <p>Anesthesiologist: _____ Pager # _____<br/> <small>SIGNATURE REQUIRED</small> <small>PRINTED NAME REQUIRED</small></p> |
|      |      | <p><b>PACU to Floor Transfer/Transport Orders</b></p> <p><input type="checkbox"/> Supplementary O<sub>2</sub>: Specify: _____</p> <p><input type="checkbox"/> If not contra-indicated, position on side or reverse-Trendelenberg.</p> <p><input type="checkbox"/> Continuous oximetry.</p> <p><input type="checkbox"/> Trained staff (e.g. PACU nurse) to accompany fully awake patient.</p> <p><input type="checkbox"/> Handover to the nurse that will be caring for the patient including documentation of the OSA risk.</p> <p>Anesthesiologist: _____ Pager # _____<br/> <small>SIGNATURE REQUIRED</small> <small>PRINTED NAME REQUIRED</small></p>                                                                                                                                                                                                                                                                                                                                                                                                                                                                                                                                                                                                                                                                                                                                                                                                                                                                                                                                                                                                                                                                                                                |

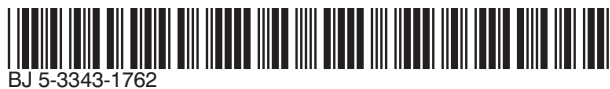

Supplement: NIHMS552168-supplement-02.pdf [file NIHMS552168-supplement-02.pdf]
